# Supplementary material for: Multimodal Deep Learning for Prognosis Prediction in Renal Cancer
Source: PubMed Central journal article supplement (PMC8651560; doi:10.3389/fonc.2021.788740), 2021-11-24
Supplement: DataSheet_2.pdf [file DataSheet_2.pdf]

Suppl\_Table\_2

| Patient_ID | DSS_Status | Months_of_DSS | 5YSS        | Grading | T-Stage | N-Stage | M-Stage | Count_Histo_L5 | Count_Histo_L10 | Count_Radiology | Entity_Radiology |
|------------|------------|---------------|-------------|---------|---------|---------|---------|----------------|-----------------|-----------------|------------------|
| ANO_00264  | 0          |               | 71 living   | G1      | pT1b    | pNx     | Mx      | 240            | 89              |                 | 3 CT             |
| ANO_00777  | 0          |               | 76 living   | G3      | pT3a    | pNx     | Mx      | 82             | 28              |                 | 3 CT             |
| ANO_00874  | 0          |               | 62 living   | G1      | pT1a    | pNx     | Mx      | 48             | 36              |                 | 3 CT             |
| ANO_01464  | 1          |               | 1 deceased  | G3      | pT3a    | pN0     | pM1     | 192            | 73              |                 | 3 CT             |
| ANO_01958  | 1          |               | 12 deceased | G3      | pT4     | pN0     | Mx      | 89             | 36              |                 | 3 CT             |
| ANO_03634  | 1          |               | 41 deceased | G3      | pT3a    | pN1     | Mx      | 52             | 20              |                 | 3 MRI            |
| ANO_03848  | 0          |               | 70 living   | G1      | pT1a    | pNx     | Mx      | 230            | 88              |                 | 3 CT             |
| ANO_04251  | 0          |               | 98 living   | G1      | pT1a    | pNx     | Mx      | 81             | 32              |                 | 3 CT             |
| ANO_05409  | 0          |               | 74 living   | G3      | pT1a    | pNx     | Mx      | 130            | 48              |                 | 3 CT             |
| ANO_07772  | 0          |               | 66 living   | G2      | pT3a    | pNx     | Mx      | 54             | 30              |                 | 3 CT             |
| ANO_07865  | 1          |               | 1 deceased  | G2      | pT3a    | pN0     | pM1     | 157            | 58              |                 | 3 CT             |
| ANO_08613  | 0          |               | 62 living   | G3      | pT1b    | pNx     | Mx      | 146            | 56              |                 | 3 CT             |
| ANO_08736  | 0          |               | 91 living   | G2      | pT1a    | pNx     | Mx      | 197            | 73              |                 | 3 CT             |
| ANO_09164  | 0          |               | 65 living   | G2      | pT1a    | pNx     | Mx      | 60             | 30              |                 | 3 CT             |
| ANO_09225  | 0          |               | 62 living   | G2      | pT1a    | pNx     | Mx      | 52             | 32              |                 | 3 CT             |
| ANO_09404  | 1          |               | 0 deceased  | G4      | pT4     | pN0     | pM1     | 65             | 23              |                 | 3 CT             |
| ANO_09416  | 0          |               | 89 living   | G1      | pT1b    | pNx     | Mx      | 109            | 37              |                 | 3 CT             |
| ANO_09579  | 1          |               | 43 deceased | G3      | pT3a    | pN0     | Mx      | 153            | 55              |                 | 3 CT             |
